# Supplementary material
Source: Research Square preprint supplement (doi:10.21203/rs.3.rs-9281440/v1)
Supplement: Supplementary file 1 [file 28d04719dbe7141432d6fec5.docx]

**FIGURES**

*Manuscript: Evaluation of Road Traffic Noise Pollution Using the IDW Interpolation Method*

*Municipality of Ain Benian, Algiers, Algeria*

Submitted to: Environmental Monitoring and Assessment (Springer)

ISSN: 0167-6369 (print) | 1573-2959 (online)

Total figures: 11 (Figs. 1–11)

**Figure 1**


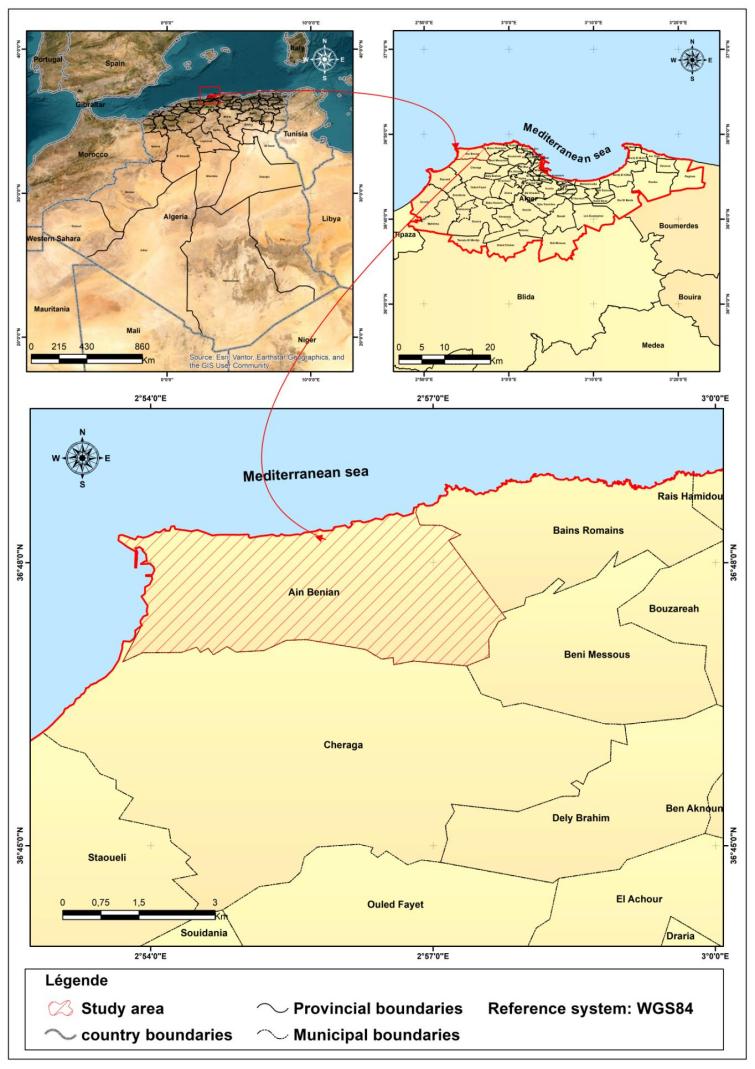


**Fig. 1** *Location map of the study area — Municipality of Ain Benian, Algiers, Algeria.*

*Note: Map lines delineate study areas and do not necessarily depict accepted national boundaries.*

**Figure 2**


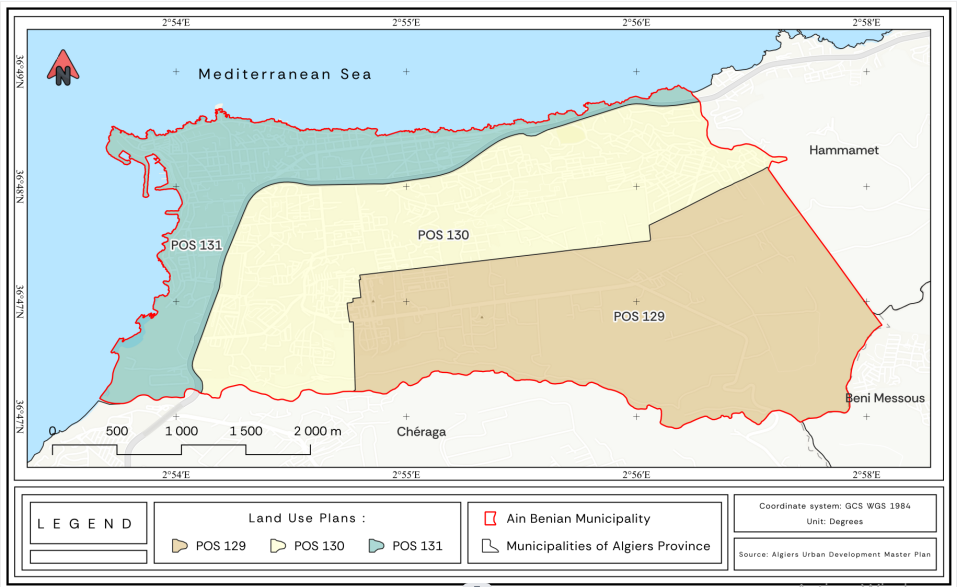


**Fig. 2** *Zoning of Ain Benian municipality into POS 129, 130, and 131.*

*Note: Map lines delineate study areas and do not necessarily depict accepted national boundaries.*

**Figure 3**


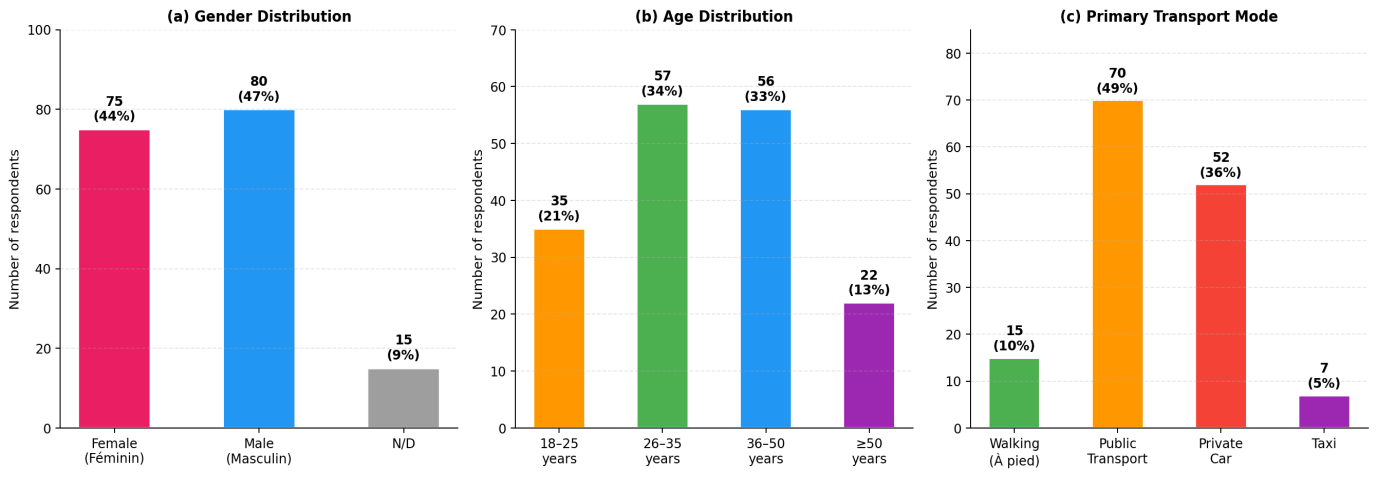


**Fig. 3** *Survey results: (a) gender distribution, (b) age distribution, and (c) primary transport mode among 170 respondents (Ain Benian, 2024).*

**Figure 4**


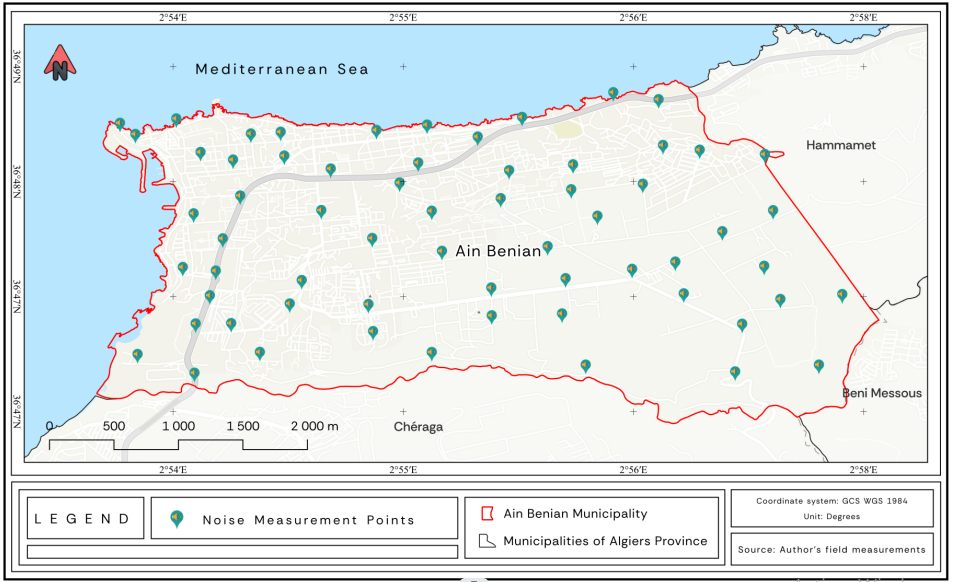


**Fig. 4** *Location map of the 63 measurement stations across Ain Benian municipality.*

**Figure 5a**


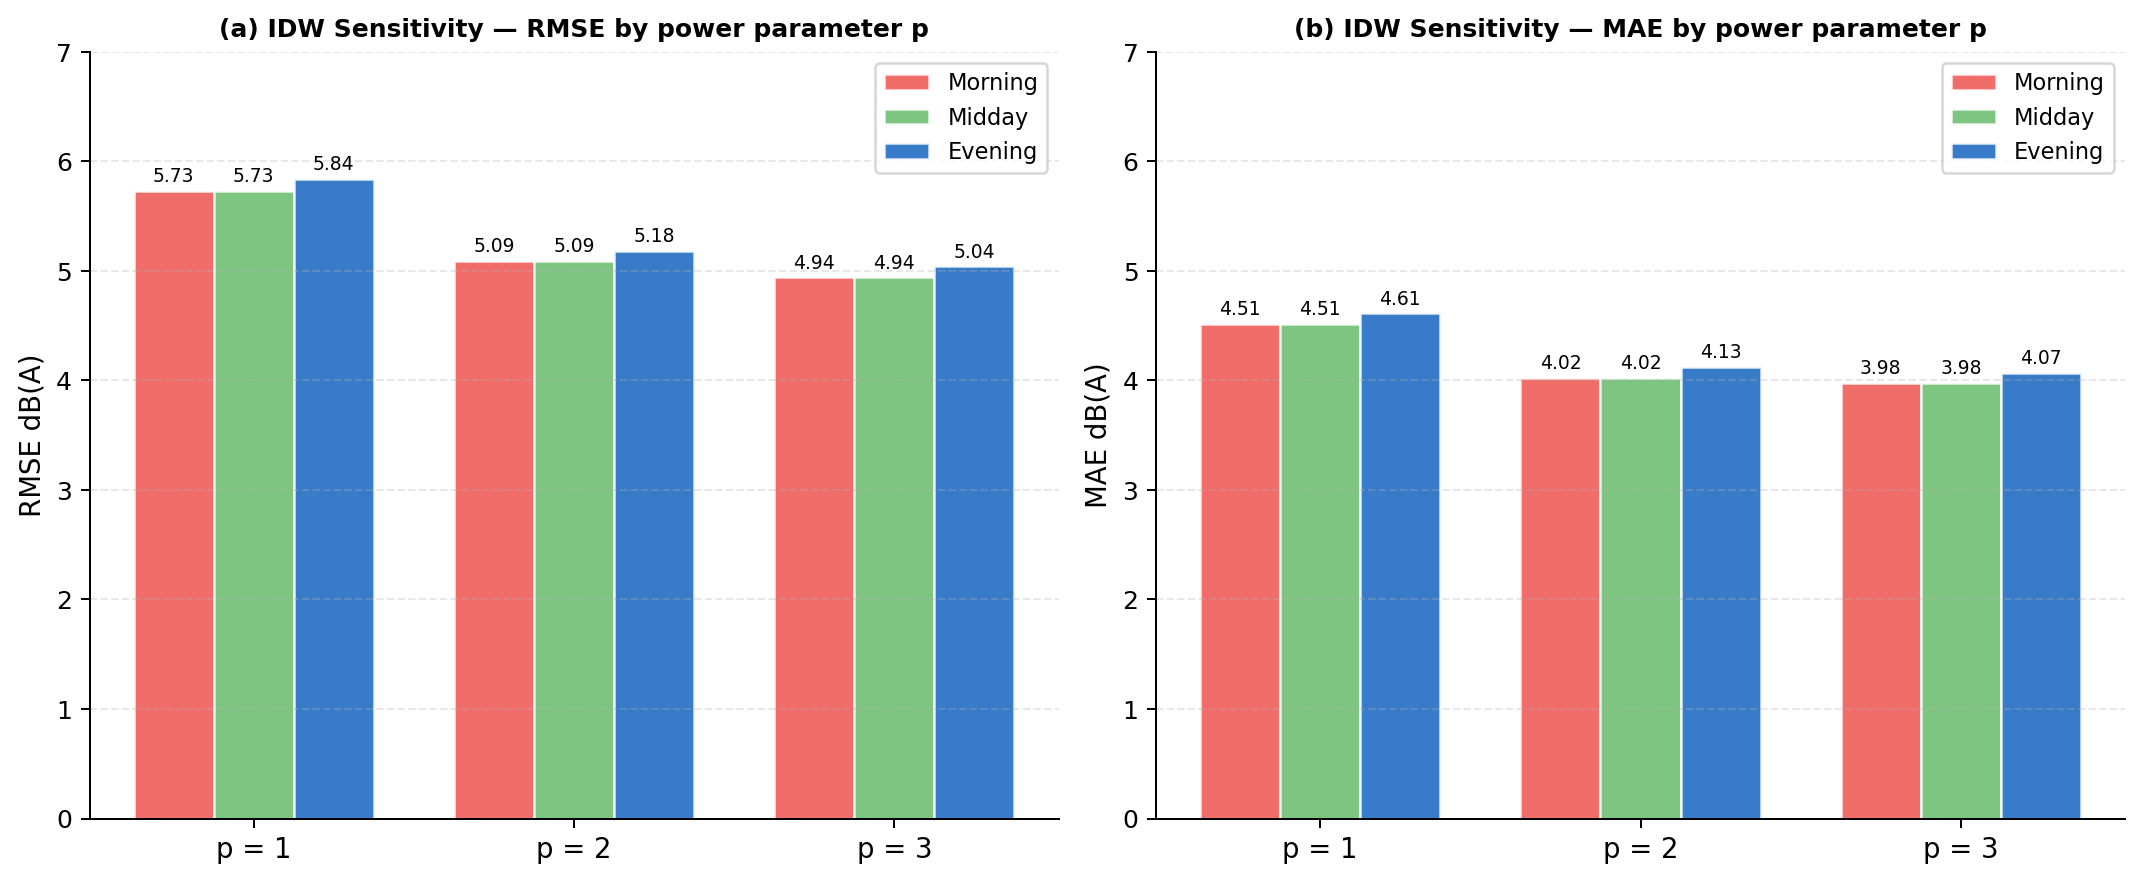


**Fig. 5a** *Sensitivity analysis of the IDW power parameter (p = 1, 2, 3): RMSE and MAE values for the three measurement periods. p = 2 was selected as the optimal value.*

**Figure 5b**


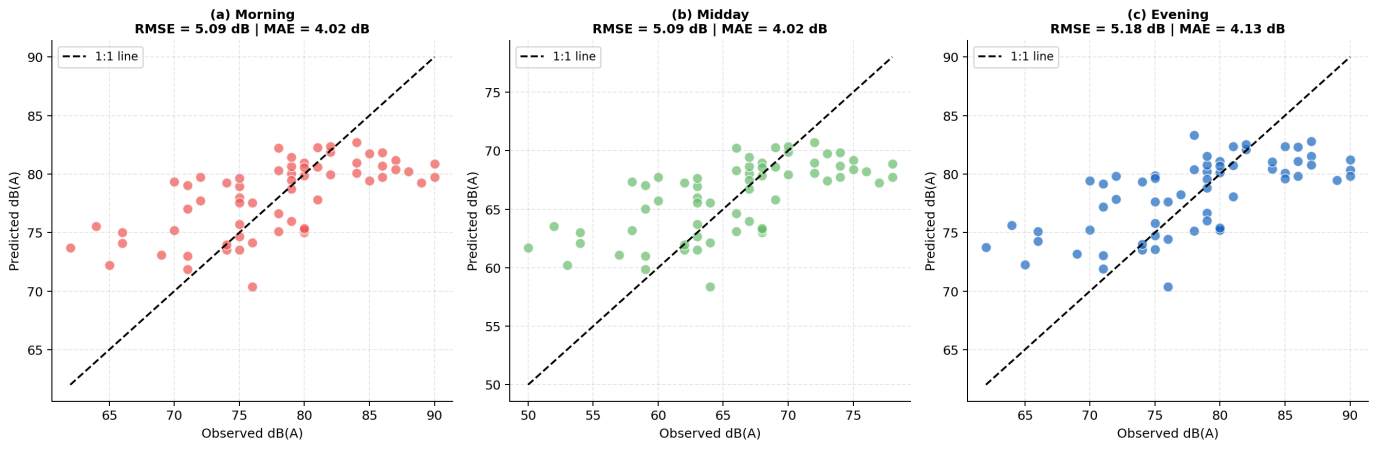


**Fig. 5b** *Leave-one-out cross-validation (LOOCV) results: predicted vs. observed noise levels for morning, midday, and evening periods. RMSE = 5.09 dB(A) (morning and midday), 5.18 dB(A) (evening).*

**Figure 6**


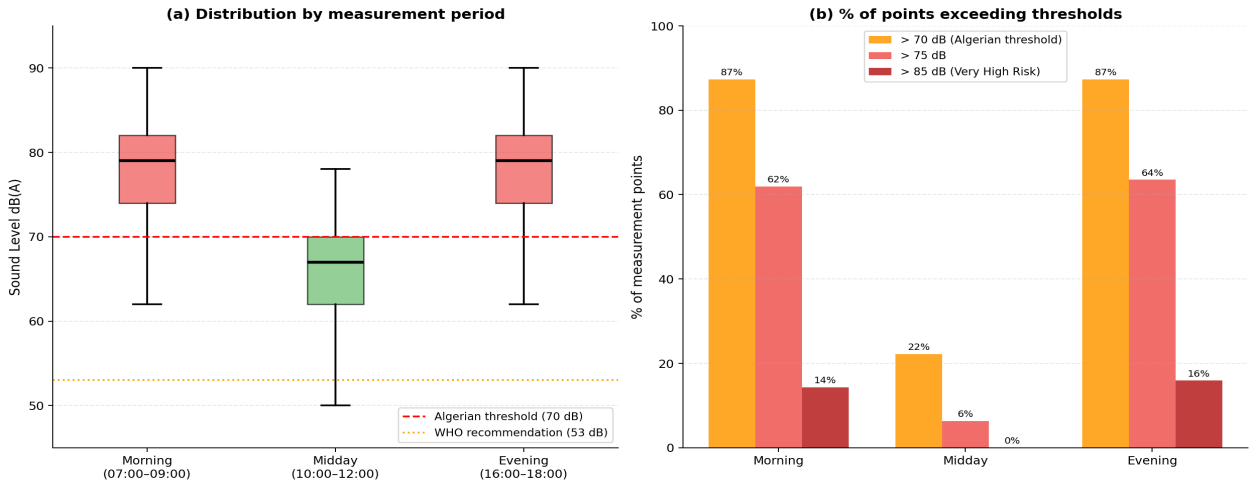


**Fig. 6** *(a) Boxplot distribution of noise levels by measurement period with WHO (53 dB) and Algerian (70 dB) regulatory thresholds; (b) percentage of measurement points exceeding noise thresholds by period.*

**Figure 7**


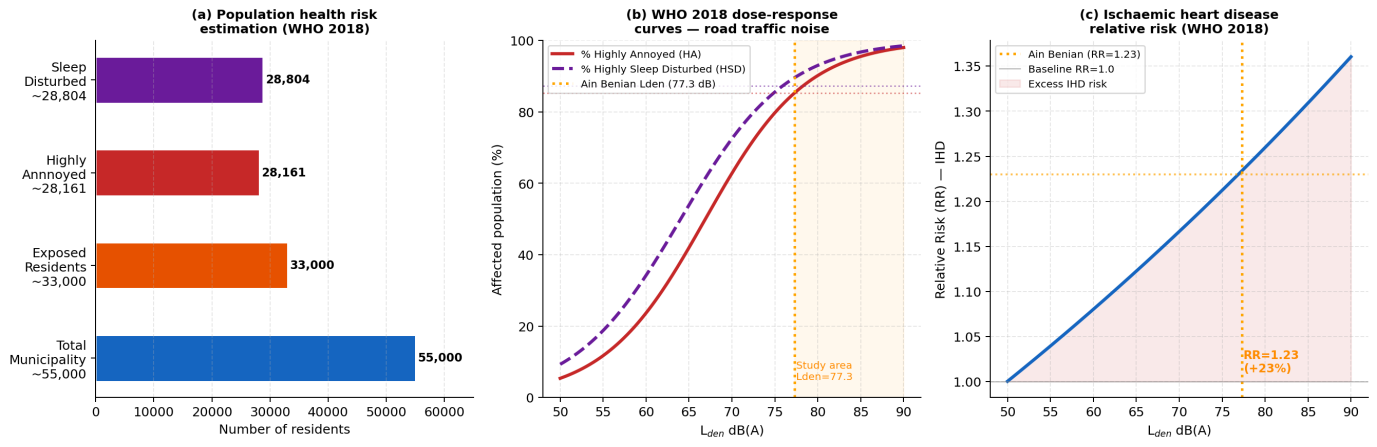


**Fig. 7** *Indicative health risk assessment based on WHO (2018) dose–response functions applied to estimated Lden: (a) estimated number of residents potentially affected; (b) proportion highly annoyed and at sleep disturbance risk as a function of Lden; (c) relative risk for ischaemic heart disease as a function of Lden.*

*Note: Values are indicative estimates subject to the limitations described in the text.*

**Figure 8**


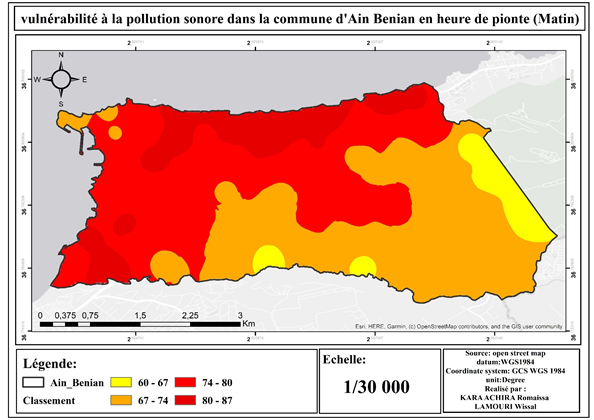


**Fig. 8** *Noise vulnerability map — Morning period (07:00–09:00).*

*Note: Map lines delineate study areas and do not necessarily depict accepted national boundaries.*

**Figure 9**


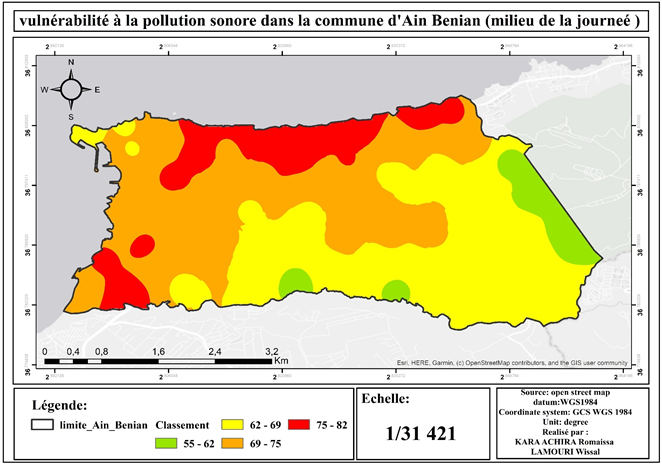


**Fig. 9** *Noise vulnerability map — Midday period (10:00–12:00).*

*Note: Map lines delineate study areas and do not necessarily depict accepted national boundaries.*

**Figure 10**


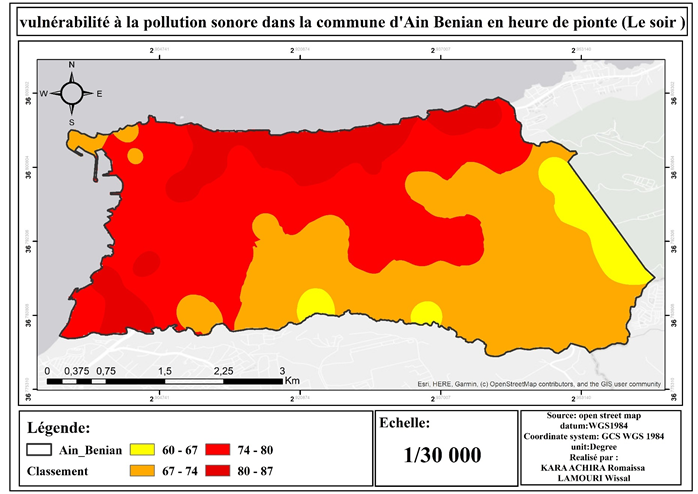


**Fig. 10** *Noise vulnerability map — Evening period (16:00–18:00).*

*Note: Map lines delineate study areas and do not necessarily depict accepted national boundaries.*

**Figure 11**


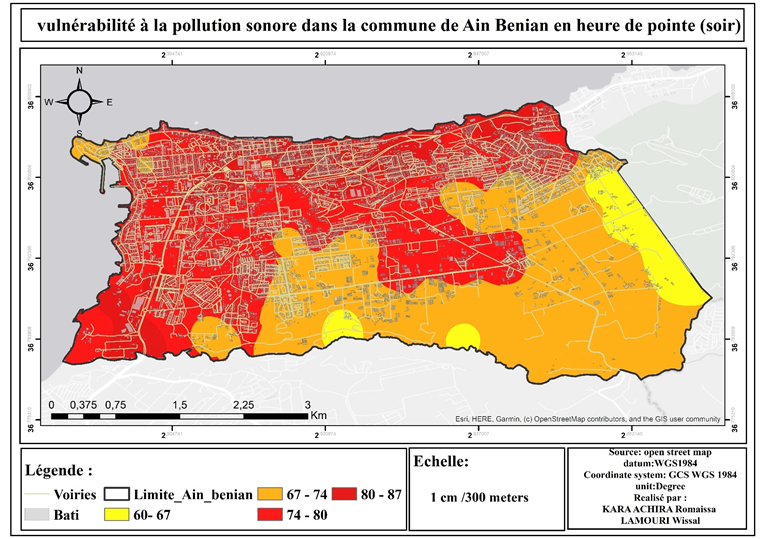


**Fig. 11** *Summary noise map and spatial distribution of exposure zones in Ain Benian municipality.*

*Note: Map lines delineate study areas and do not necessarily depict accepted national boundaries.*
